# Supplementary material for: Temperature controlled shape evolution of iron oxide nanostructures in HMTA media
Source: Royal Society of Chemistry journal article supplement (doi:10.1039/c7ra03603e), 2017-01-01
Supplement: c7ra03603e1.pdf [file c7ra03603e1.pdf]

## Electronic Supplementary Information

# Temperature Controlled Shape Evolution of Iron Oxide Nanostructures in HMTA Media

*Bin Zhao*<sup>a, ‡</sup>, *Kevin M. Ryan*<sup>b</sup>, *Emmet O'Reilly*<sup>b</sup>, *Conor McCarthy*<sup>a, \*</sup>

a. School of Engineering, Bernal Institute, University of Limerick, Limerick, Ireland.

b. School of Natural Sciences, Bernal Institute, University of Limerick, Limerick, Ireland.

‡ Present Address. Chair of Materials Science, Otto Schott Institute of Materials Research, Friedrich Schiller University  
Jena, Löbdergraben 32, 07743 Jena, Germany.

\* Corresponding author. E-mail address: [Conor.McCarthy@ul.ie](mailto:Conor.McCarthy@ul.ie). Tel.: +353 61 234334. Fax: +353 61 202944.

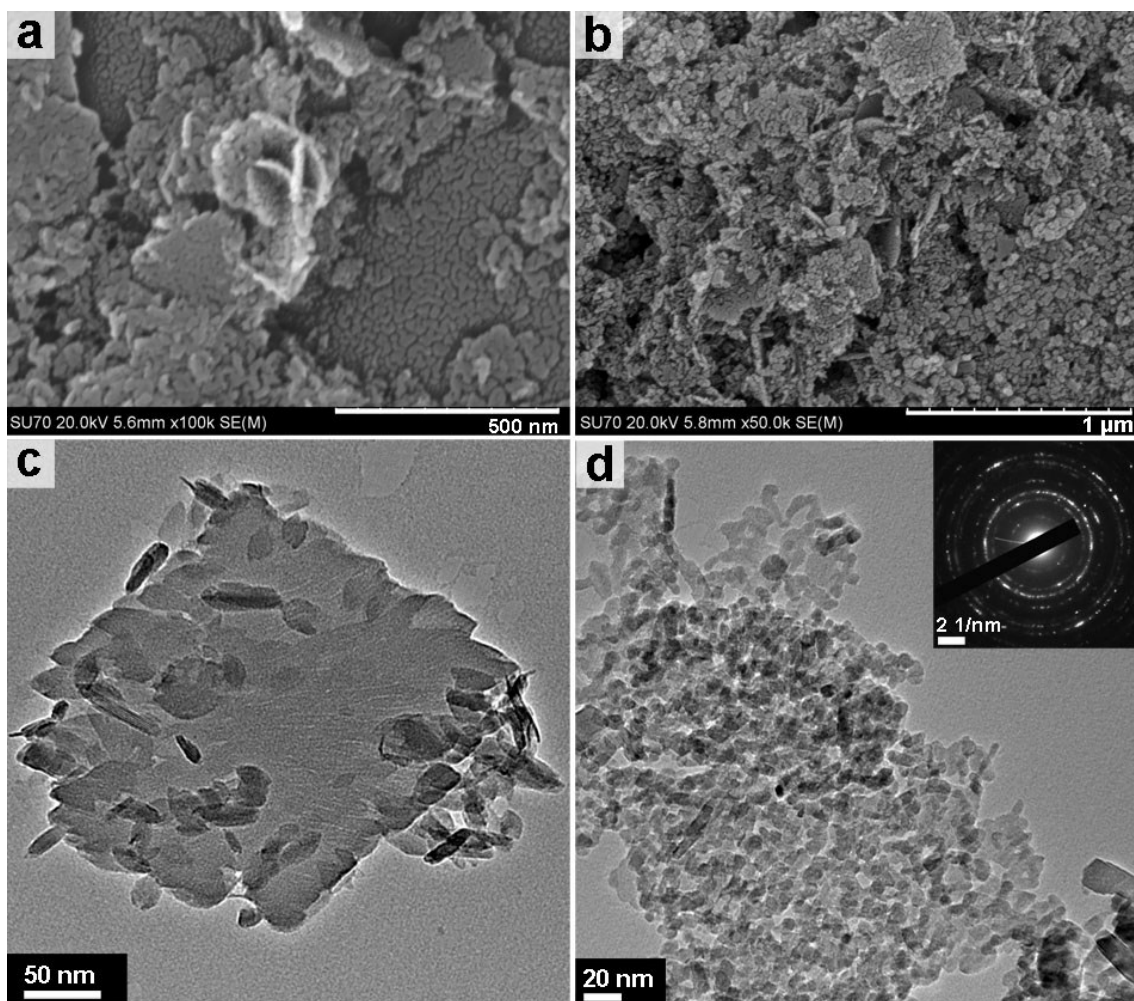

**Fig. S1** FESEM and TEM images of the sample obtained under solvothermal treatment at 160 °C (a & c) and then calcined at 400 °C (b & d); Inset in Fig. S1d: the corresponding SAED pattern.

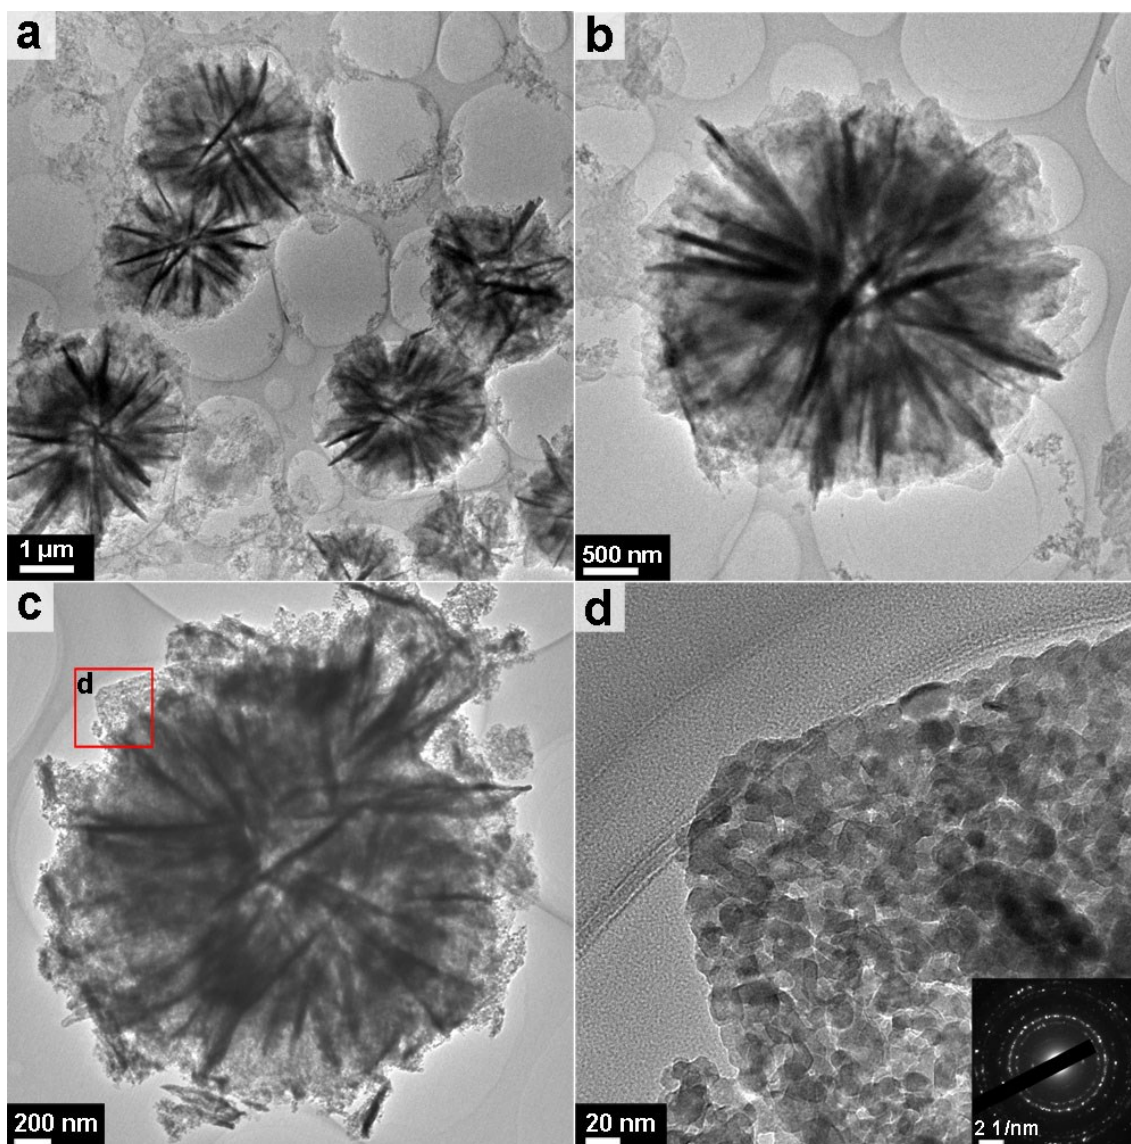

**Fig. S2** TEM images of the sample obtained under solvothermal treatment at 180 °C (a & b) and then calcined at 400 °C (c & d); Inset in Fig. S2d: the corresponding SAED pattern.

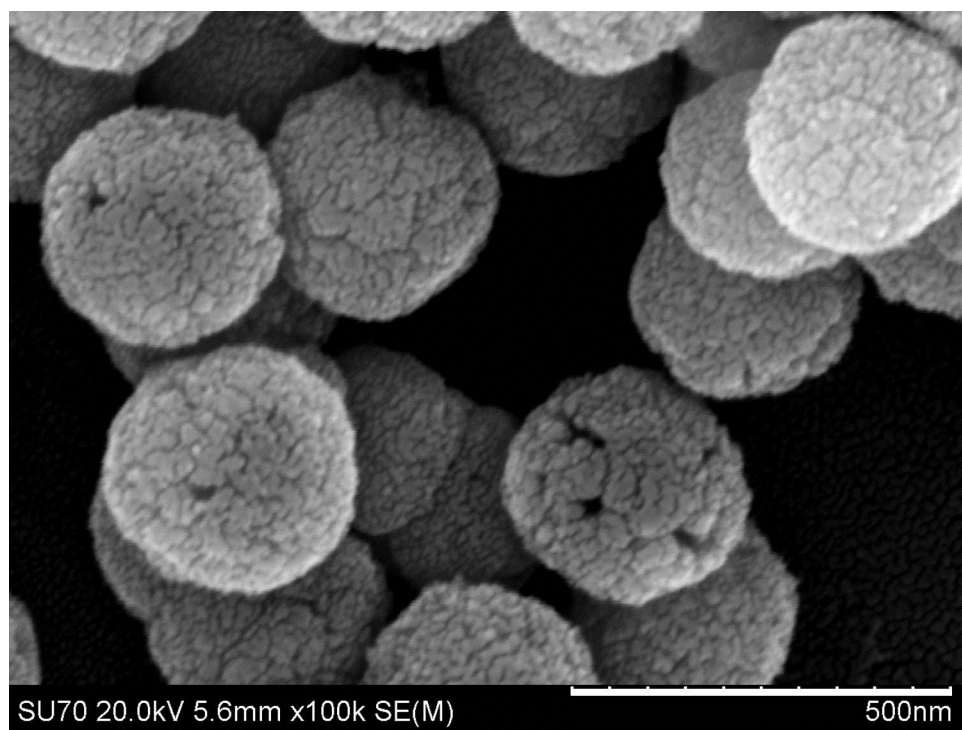

**Fig. S3** FESEM image of the sample obtained under solvothermal treatment at 200 °C.

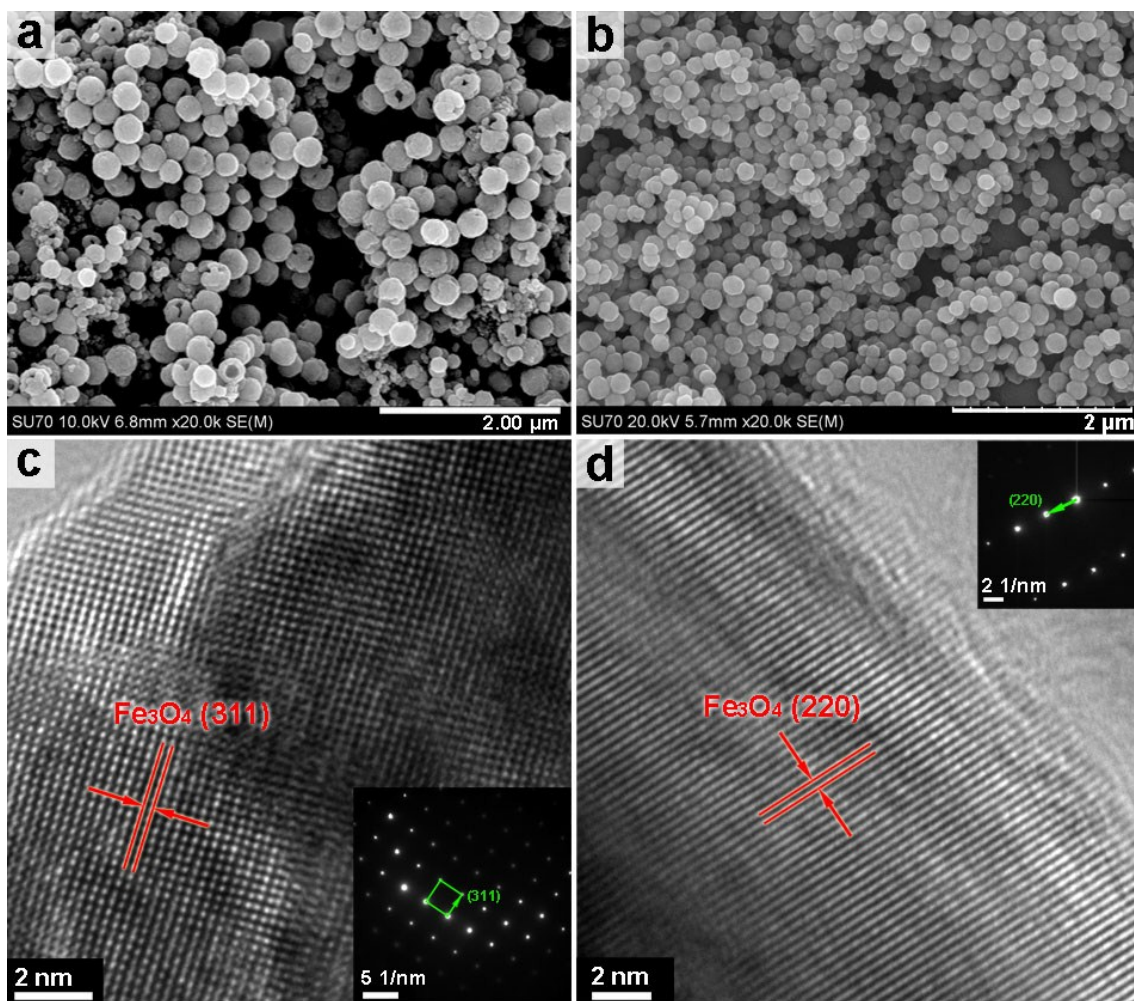

**Fig. S4** FESEM and TEM images of the samples obtained under solvothermal treatment at 220 °C (a & c) and 240 °C (b & d); Inset in Fig. S3c or S3d: the corresponding SAED patterns.

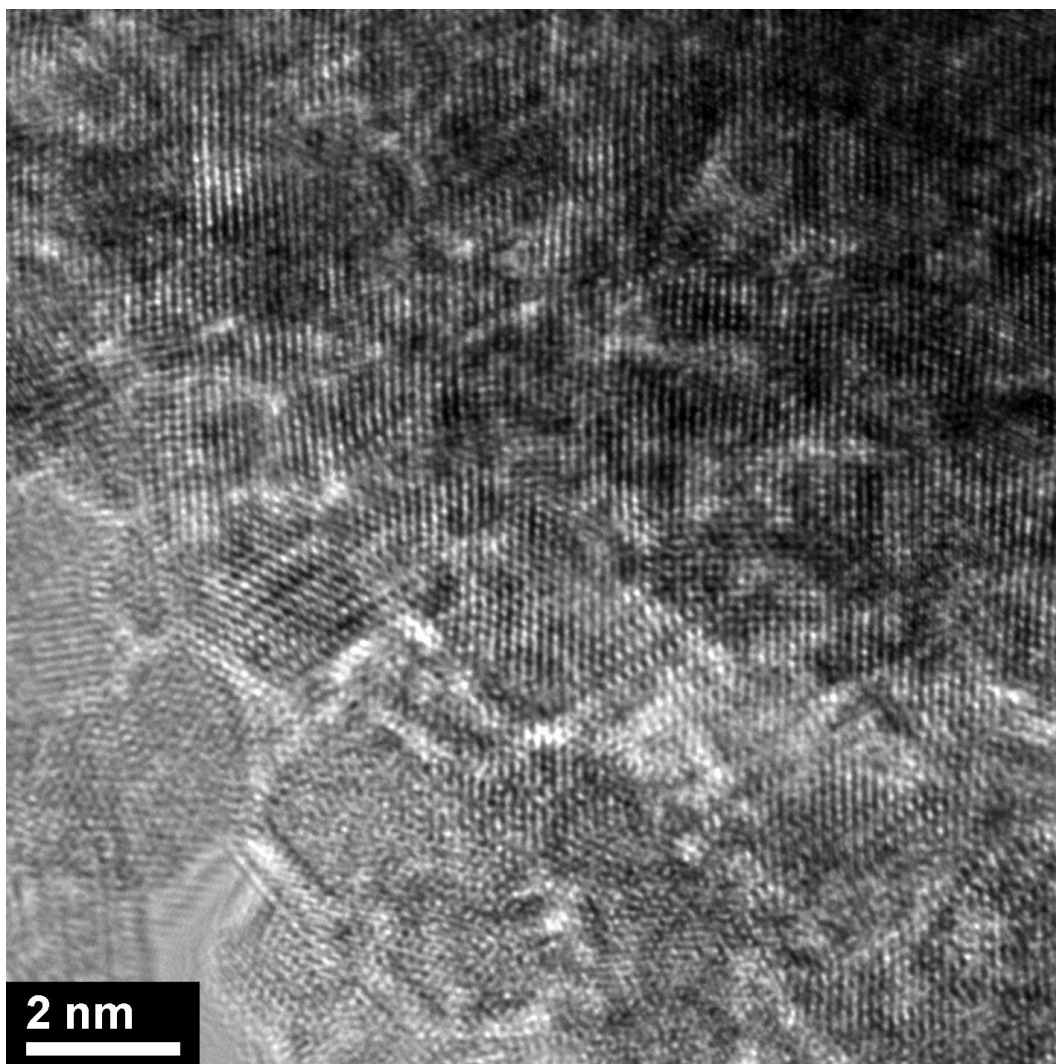

**Fig. S5** The magnified TEM image for Fig. 6f in the main paper.

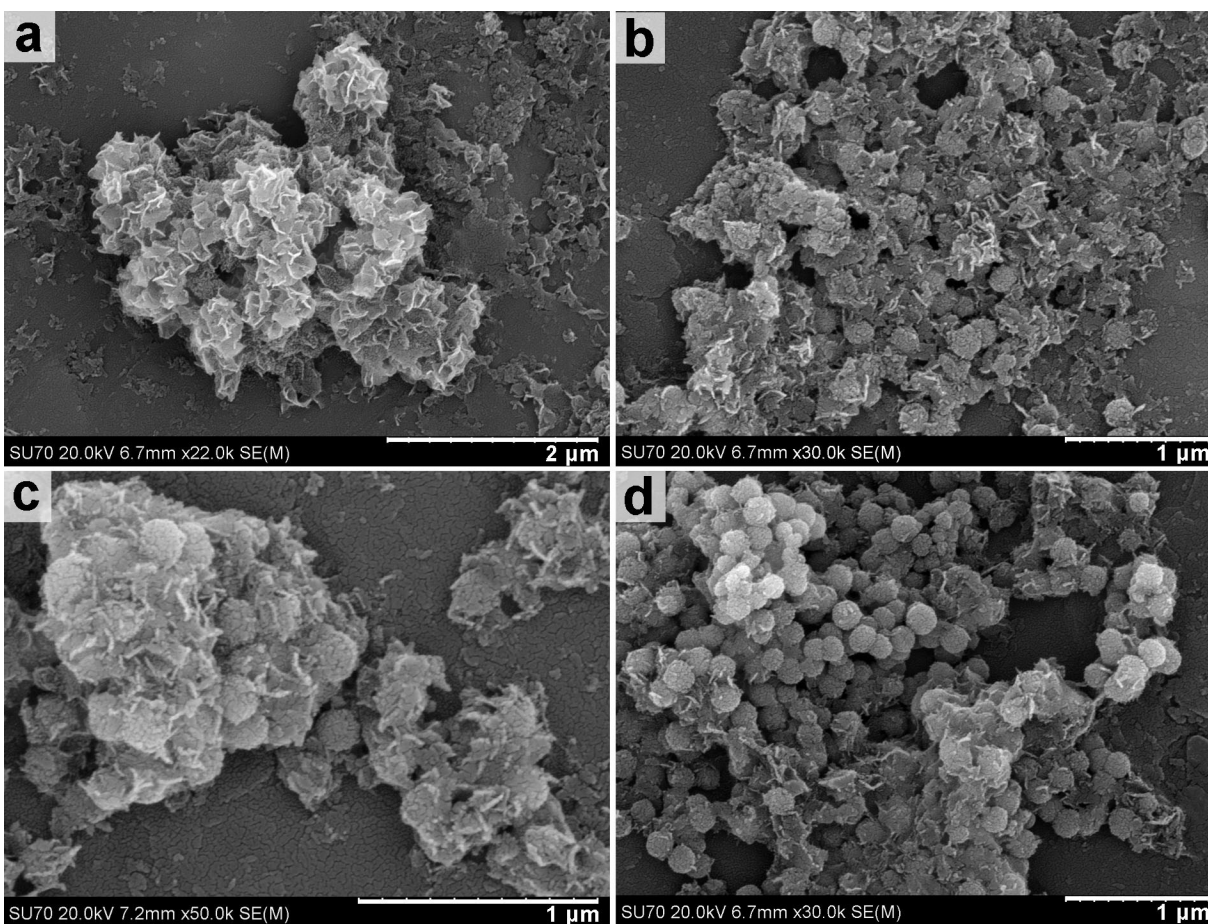

**Fig. S6** FESEM images of the samples obtained under solvothermal treatment at 200 °C for for 7 (a), 8 (b), 9 (b) and 10 h (c & d).
